# FOCUS

THE JOURNAL OF LIFELONG LEARNING IN PSYCHIATRY

## *Anxiety Disorders*

*Guest Editor, R. Bruce Lydiard, Ph.D., M.D.*

### IN CLINICAL SYNTHESIS:

Assessment and Management of  
Treatment-Resistance in Panic Disorder

*R. Bruce Lydiard, Ph.D., M.D.*

Understanding and Managing Clinically Significant  
Pain in Patients with an Anxiety Disorder

*Gordon J. G. Asmundson, Ph.D., R.D. Psych, FRSC*

*Katherine A. McMillan, M.A.*

*R. Nicholas Carleton, Ph.D., R.D. Psych*

Medication Treatments for Social Anxiety Disorder

*Jonathan Shaywitz, M.D.*

Psychotic Symptoms in Posttraumatic Stress Disorder

*Mark B. Hamner, M.D.*

AND INFLUENTIAL PUBLICATIONS . . .
