# Resources for Treating Anxiety Disorders

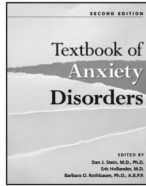

## Textbook of Anxiety Disorders, Second Edition

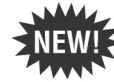

Edited by Dan J. Stein, M.D., Ph.D., Eric Hollander, M.D.,  
and Barbara O. Rothbaum, Ph.D., A.B.P.P.

This new edition features new chapters on anxious traits and temperaments, the neuropsychology of anxiety disorders, and anxiety and insomnia. Other chapters have been entirely rewritten by new authors to provide fresh insight into such topics as integrated treatment of anxiety disorders; pharmacotherapy for GAD, OCD, and panic disorder; psychotherapy for OCD and PTSD; anxiety disorders in the elderly; anxiety accompanying substance abuse; and the economic and social costs of anxiety. All chapters have been expanded and fully updated with new research findings, and each now includes a concise summary of key clinical points to help readers put those findings into practice.

This important new resource offers both clinicians and researchers a single-volume resource that covers not only advances in clinical interventions but also the latest advances in theoretical knowledge.

2010 • 822 pages • ISBN 978-1-58562-254-2 • Hardcover • \$125.00 • Item #62254

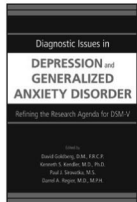

## Diagnostic Issues in Depression and Generalized Anxiety Disorder Refining the Research Agenda for DSM-V

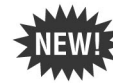

Edited by David Goldberg, D.M., F.R.C.P, Kenneth S. Kendler, M.D., Paul J. Sirovatka, M.S.,  
and Darrel A. Regier, M.D., M.P.H.

This book acts as a guidepost for the entire DSM process. It reviews recent scientific advances in our understanding of the interrelationship between GAD and MD, summarizes the body of evidence into a few broad conclusions, and reflects on the implications of these findings for future nosologic efforts. The contributing authors review conceptual issues and empirical data from a variety of perspectives, including genetics, biology, treatment, development, course, predictors, disability, and psychosocial stressors.

*Diagnostic Issues in Depression and Generalized Anxiety Disorder* develops operationalized criteria for nosologic decisions that enable clinicians to bridge the gap between data and diagnostic recommendations. Not only does the methodology of investigating an active interchange between empirical and conceptual perspectives shed new light on the relationship between GAD and MD, but it also carries implications for the rest of DSM-V.

2010 • 400 pages • ISBN 978-0-89042-456-8 • Paperback • \$70.00 • Item #2456

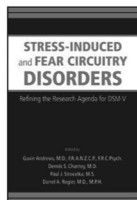

## Stress-Induced and Fear Circuitry Disorders Refining the Research Agenda for DSM-V

Edited by Gavin Andrews, M.D., Dennis S. Charney, M.D., Paul J. Sirovatka, M.S., and Darrel A. Regier, M.D., M.P.H.

This volume summarizes current research to determine whether a specific group of stress-induced and fear-based disorders form a distinct syndrome independent from other anxiety disorders. Intended to contribute to DSM-V revisions regarding classification of these disorders, *Stress-Induced and Fear Circuitry Disorders* reflects findings that may lead to more refined treatments for these conditions based on a better understanding of the biological and environmental factors that contribute to their development.

Thirty international authorities clarify how these disorders develop and what factors contribute to symptomatology. Focusing on posttraumatic stress disorder, panic disorder and agoraphobia, social phobia, and specific phobia, the authors explore the possibility of linking the classification and etiology of these conditions by showing that they may be closely related in terms of brain pathophysiology. By offering important new ways of thinking about these disorders, the book not only allows researchers to more accurately assess these diagnostic classifications but also can help clinicians more effectively communicate with patients regarding the nature of their illness and its treatment.

2009 • 330 pages • ISBN 978-0-89042-344-8 • Paperback • \$70.00 • Item #2344

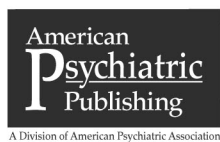

A Division of American Psychiatric Association

[www.appi.org](http://www.appi.org)

Email: [appi@psych.org](mailto:appi@psych.org)

Phone: 1-800-368-5777

Find us on Facebook and Twitter.

The First and Last Word in Psychiatry

Priority Code AH1129

# Recently Published Bestsellers!

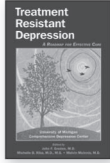

## Treatment Resistant Depression A Roadmap for Effective Care

Edited by John F. Greden, M.D.,  
Michelle B. Riba, M.D., M.S.,  
and Melvin G. McInnis, M.D.

2011 • 822 pages • ISBN 978-1-58562-254-2  
Hardcover • \$125.00 • Item #62254

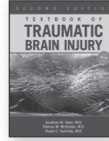

## Textbook of Traumatic Brain Injury, Second Edition

Edited by Jonathan M. Silver, M.D.,  
Thomas W. McAllister, M.D.,  
and Stuart C. Yudofsky, M.D.

2011 • 686 pages • ISBN 978-1-58562-357-0  
Hardcover • \$159.00 • Item #62357

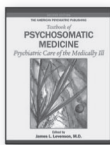

## The American Psychiatric Publishing Textbook of Psychosomatic Medicine Psychiatric Care of the Medically Ill

Edited by James L. Levenson, M.D.

2011 • 1200 pages • ISBN 978-1-58562-379-2  
Hardcover • \$219.00 • Item #62379

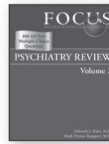

## FOCUS Psychiatry Review Volume 2

Edited by Deborah J. Hales, M.D.,  
and Mark Hyman Rapaport, M.D.

*Earn up to 50 AMA PRA Category 1 Credits™*  
2011 • 231 pages • ISBN 978-0-89042-346-2  
Paperback • \$59.00 • Item #2346

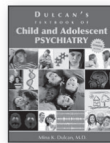

## Dulcan's Textbook of Child and Adolescent Psychiatry

Edited by Mina K. Dulcan, M.D.

2010 • 1104 pages • ISBN 978-1-58562-323-5  
Hardcover • \$249.00 • Item #62323

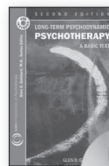

## Long-Term Psychodynamic Psychotherapy A Basic Text, Second Edition

**Core Competencies  
in Psychotherapy**

Glen O. Gabbard, M.D.

Series Editor: Glen O. Gabbard, M.D.

2010 • 233 pages • ISBN 978-1-58562-385-3  
Paperback • \$65.00 • Item #62385

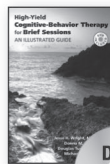

## High-Yield Cognitive-Behavior Therapy for Brief Sessions An Illustrated Guide

Jesse H. Wright, M.D., Ph.D.,  
Donna M. Sudak, M.D.,  
Douglas Turkington, M.D.,  
and Michael E. Thase, M.D.

2010 • 383 pages • ISBN 978-1-58562-362-4  
Paperback • \$74.00 • Item #62362

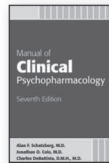

## Manual of Clinical Psychopharmacology, Seventh Edition

Alan F. Schatzberg, M.D., Jonathan O. Cole, M.D.,  
and Charles DeBattista, D.M.H., M.D.

2010 • 744 pages • ISBN 978-1-58562-377-8  
Paperback • \$92.00 • Item #62377

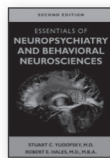

## Essentials of Neuropsychiatry and Behavioral Neurosciences, Second Edition

Edited by Stuart C. Yudofsky, M.D.,  
and Robert E. Hales, M.D., M.B.A

2010 • 629 pages • ISBN 978-1-58562-376-1  
Paperback • \$129.00 • Item #62376

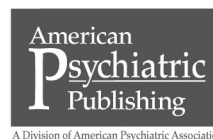

[www.appi.org](http://www.appi.org)

Email: [appi@psych.org](mailto:appi@psych.org)  
Phone: 1-800-368-5777

The *First* and *Last* Word in Psychiatry

Find us on Facebook and Twitter.

Priority Code AH1130
