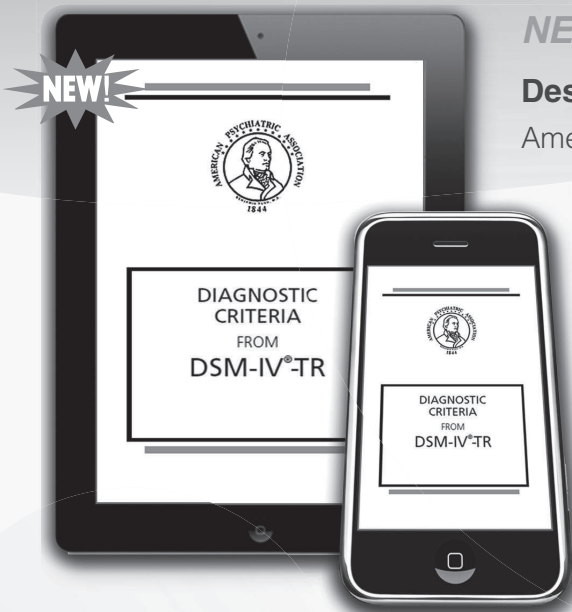

**NEW DSM APP available for iPhone and iPad!**

**Desk Reference to the Diagnostic Criteria From DSM-IV-TR®**

American Psychiatric Association

The *Desk Reference to the Diagnostic Criteria From DSM-IV-TR®* is a concise, affordable companion to the ultimate psychiatric reference, DSM-IV-TR®. It includes all the diagnostic criteria from DSM-IV-TR® in an easy-to-use, searchable format.

**Additional Features Include:**

- Comprehensive listing of criteria and codes, including those not otherwise specified (NOS) and specific diagnoses related to substance abuse
- Enhanced functionality within Classification for simpler navigation
- Addition of Favorites for saving frequently used criteria

\$46.99 • Please visit the iTunes store to purchase iPhone App & iPad App

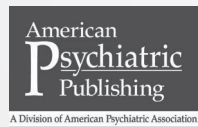

www.appi.org • 1-800-368-5777

Fax: 703-907-1091 • Email: appi@psych.org

Follow us on and

# PSYCHIATRIC NEWS alert

The Voice of the American Psychiatric Association and the Psychiatric Community

**Read All About It! Sign Up for the Psychiatric News Alert!**

*Psychiatric News* has a new way to stay in touch with you between issues—a twice daily news ALERT at [alert.psychiatricnews.org](http://alert.psychiatricnews.org).

Sign up to receive free news alerts automatically through email and RSS feeds.

**Psychiatric News Alert** reports on breaking news on topics of importance to psychiatrists—such as clinical psychiatry, psychiatric research, legislative and regulatory updates, health policy, APA advocacy initiatives, and lifelong learning—and provides links to further information in *Psychiatric News*.

Highlights also include major findings reported in APA's leading periodicals, the *American Journal of Psychiatry* and *Psychiatric Services*.

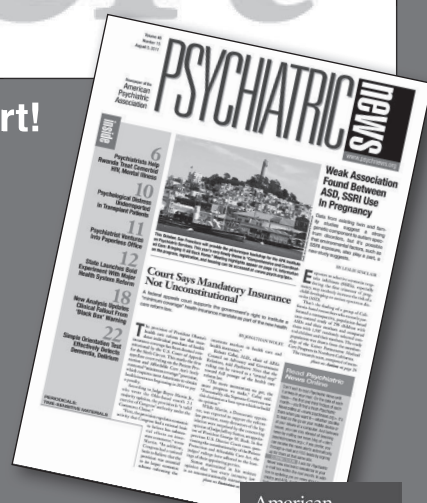

*This fall, look for a new, interactive web site and an electronic newsletter for Psychiatric News. We want to be the source you turn to for all of your professional news.*

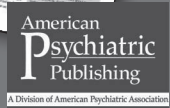

The First and Last Word in Psychiatry  
Priority Code AH1138

Subscribe to *FOCUS: The Journal of Lifelong Learning* and explore our other FOCUS products!

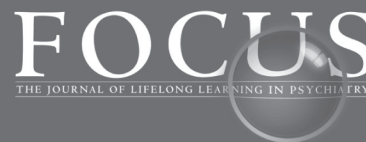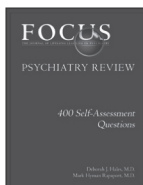

### **FOCUS Psychiatry Review – 400 Self-Assessment Questions**

**Edited by Deborah J. Hales, M.D., and Mark Hyman Rapaport, M.D.**

Program end date: July 2012

This workbook contains 400 board-type multiple-choice questions from the annual FOCUS Self-Assessment Examinations that can help psychiatrists prepare for examinations and identify areas for further study. The questions cover important clinical areas of psychiatric practice and closely follow the ABPN outline of topics.

APA is accredited by ACCME to provide continuing medical education for physicians. APA designates this educational activity for a maximum of 50 *AMA PRA Category 1 Credits™*. Physicians should claim credit commensurate with the extent of their participation in the activity.

Earn up to 50  
*AMA PRA*  
*Category 1 CME*  
*Credits™*

2007 • 201 pages • ISBN 978-0-89042-297-7 • Paperback • \$64.00 • Item #2297

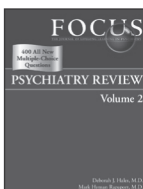

### **FOCUS Psychiatry Review – Volume 2**

**Edited by Deborah J. Hales, M.D., and Mark Hyman Rapaport, M.D.**

Program end date: February 2014

This book contains 400 new board-type multiple-choice questions derived from material in the annual FOCUS Self-Assessment Examinations that can help psychiatrists prepare for examinations and identify areas for further study. These new questions cover important clinical areas of psychiatric practice and closely follow the ABPN outline of topics.

APA is accredited by ACCME to provide continuing medical education for physicians. APA designates this educational activity for a maximum of 50 *AMA PRA Category 1 Credits™*. Physicians should claim credit commensurate with the extent of their participation in the activity.

Earn up to 50  
*AMA PRA*  
*Category 1 CME*  
*Credits™*

2011 • 231 pages • ISBN 978-0-89042-346-2 • Paperback • \$59.00 • Item #2346

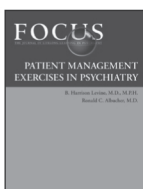

### **FOCUS Patient Management Exercises in Psychiatry**

**B. Harrison Levine, M.D., M.P.H, and Ronald C. Albucher, M.D.**

Program end date: May 2014

This is a practical and accessible self-study workbook designed for practicing psychiatrists who want to improve their knowledge of clinical psychiatry and patient care. Physicians who complete the exercises in this workbook can improve their clinical decision making, advance their communication and diagnostic abilities, evaluate their knowledge and clinical skills, learn leading-edge clinical information, and most importantly, improve patient care.

APA is accredited by ACCME to provide continuing medical education for physicians. APA designates this enduring material for a maximum of 32 *AMA PRA Category 1 Credits™*. Physicians should claim credit commensurate with the extent of their participation in the activity.

Earn up to 32  
*AMA PRA*  
*Category 1 CME*  
*Credits™*

2011 • 157 pages • ISBN 978-0-89042-661-6 • Paperback • \$59.00 • Item #2661

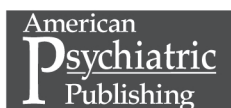

A Division of American Psychiatric Association

[www.appi.org](http://www.appi.org)

Email: [appi@psych.org](mailto:appi@psych.org)

Phone: 1-800-368-5777

The *First and Last* Word in Psychiatry

Find us on Facebook and Twitter.

Priority Code AH1127

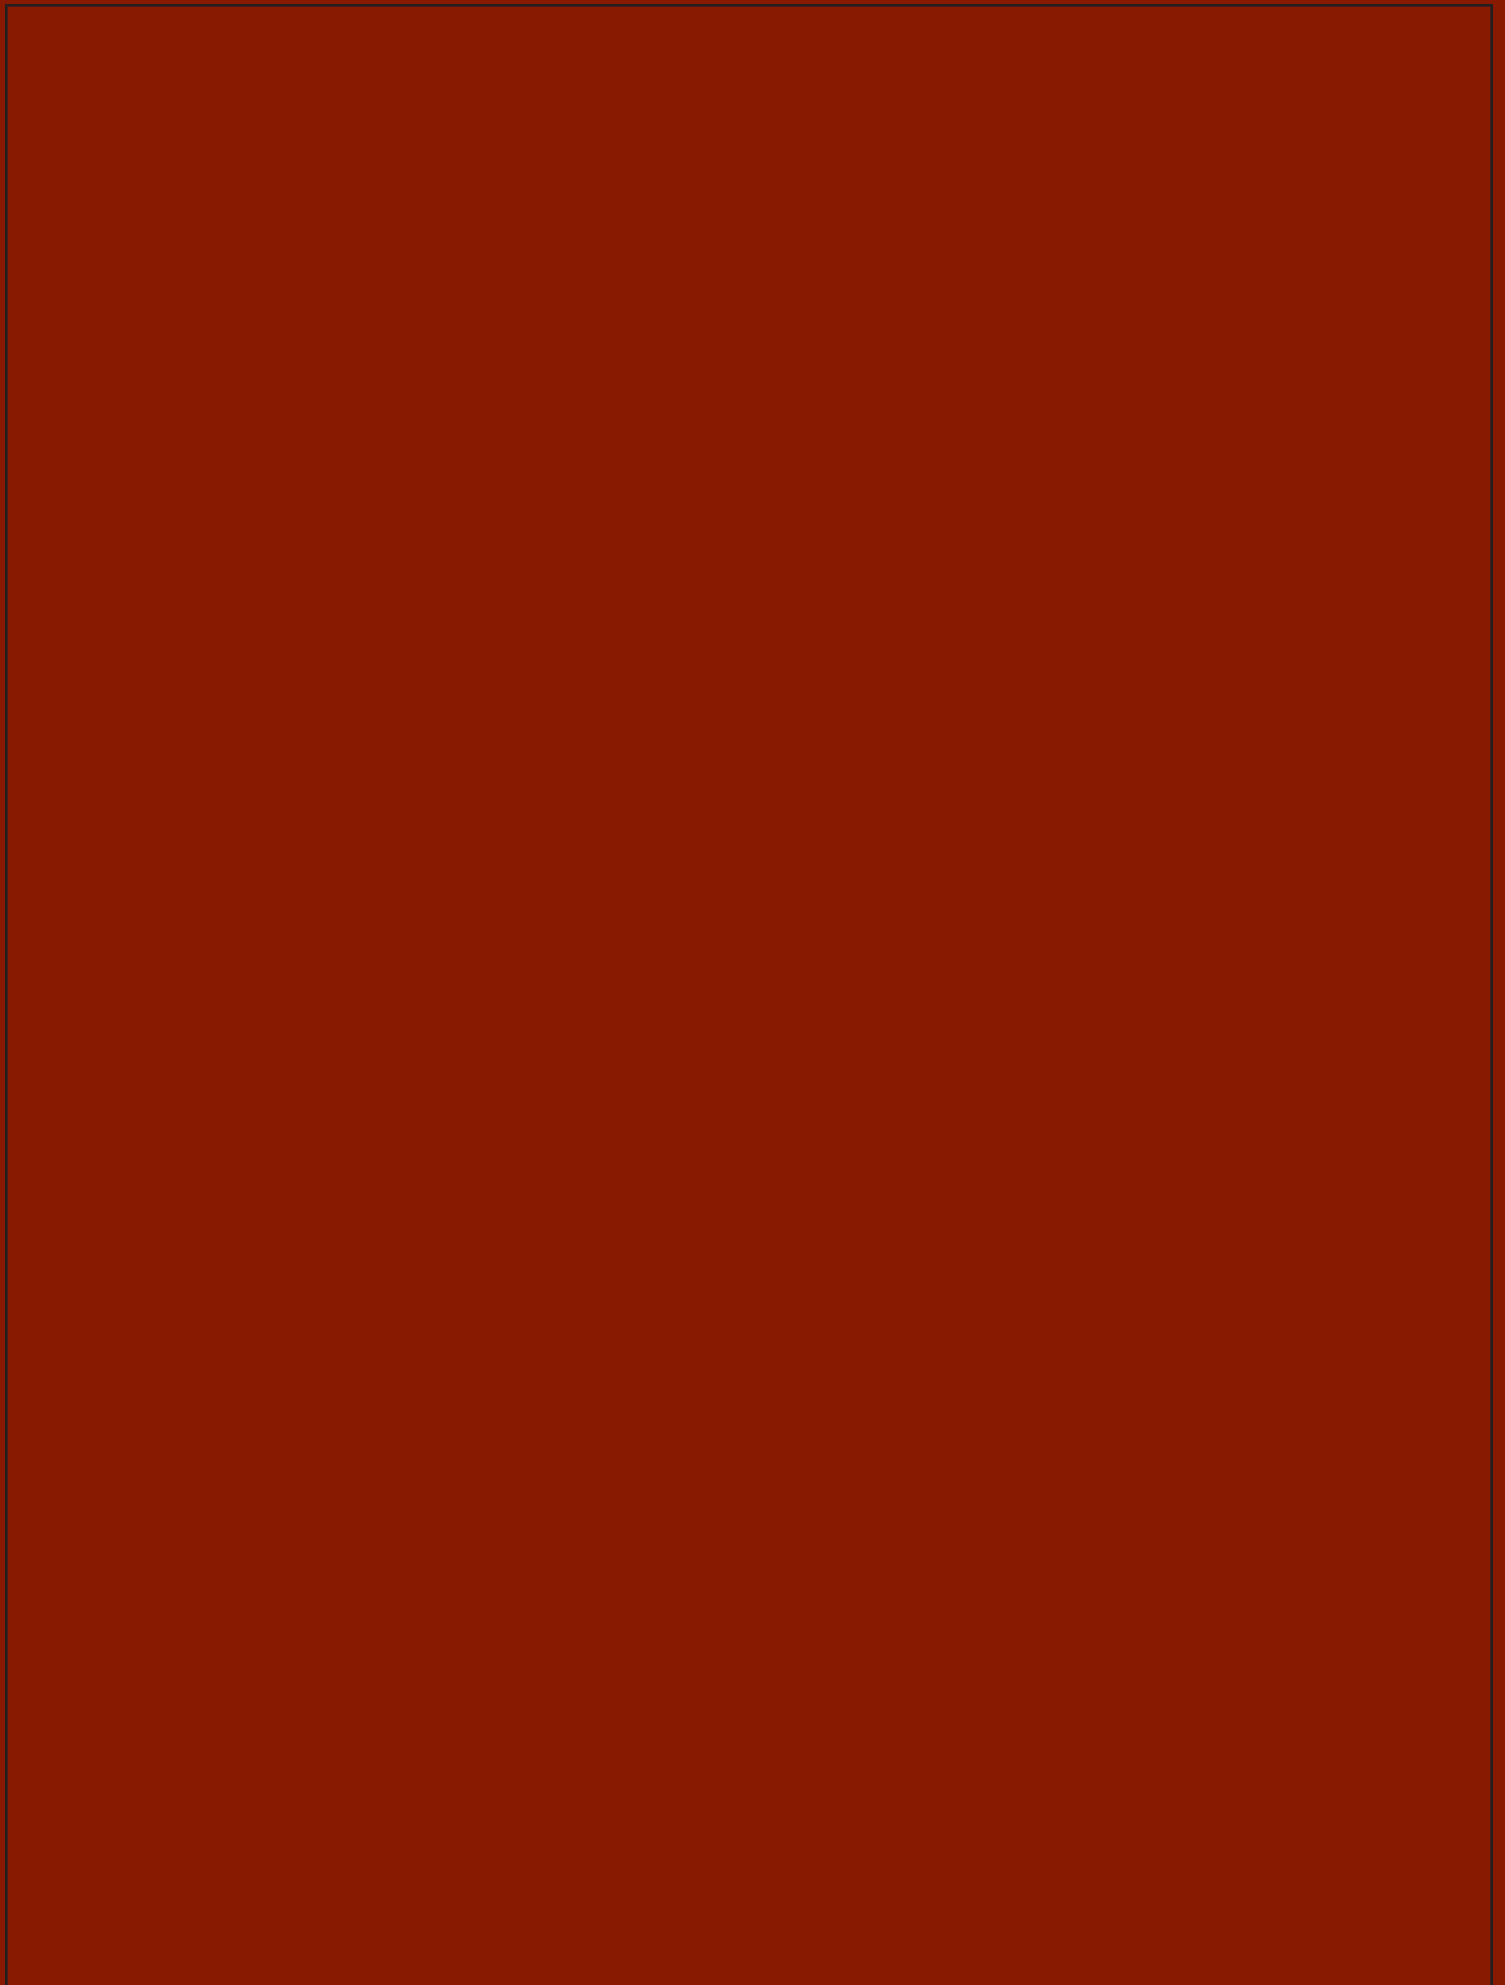

Source: https://psychiatryonline.org/doi/suppl/10.1176/foc.2011.9.issue-3/suppl_file/back.pdf
